# Supplementary material
Source: PubMed Central journal article supplement (PMC3347196)
Supplement: supp_194.10.2725_FigS1.pdf [file supp_194.10.2725_FigS1.pdf]

|               |   |                                                                         |
|---------------|---|-------------------------------------------------------------------------|
| LngA-E9034A   | 1 | MSLLEVIIVLGIIGTIAAGVVILAQRAFDSRAVTDLVTNTNTVVRVAMKDAYQRDGYPDFVDP LSLTANT |
| LngA-M526-C6B | 1 | MSLLEVIIVLGIIGTIAAGVVILAQRAFDSRAVTDLVTNTNTVVRVAMKDAYQRDGYPDFVDP LSLTANT |
| LngA-01117-5  | 1 | MSLLEVIIVLGIIGTIAAGVVILAQRAFDSRAVTDLVTNTNTVVRVAMKDAYQRDGYPDFVDP LSLTANT |
| LngA-M626-C   | 1 | MSLLEVIIVLGIIGTIAAGVVILAQRAFDSRAVTDLVTNTNTVVRVAMKDAYQRDGYPDFVDP LSLTANT |
| LngA-10159a   | 1 | MSLLEVIIVLGIIGTIAAGVVILAQRAFDSRAVTDLVTNTNTVVRVAMKDAYQRDGYPDFVDP LSLTANT |
| LngA-B7A      | 1 | MSLLEVIIVLGIIGTIAAGVVILAQRAFDSRAVTDLVTNTNTVVRVAMKDAYQRDGYPDFVDP LSLTANT |
| LngA-Br5      | 1 | MSLLEVIIVLGIIGTIAAGVVILAQRAFDSRAVTDLVTNTNTVVRVAMKDAYQRDGYPDFVDP LSLTANT |
| LngA-M633-C1  | 1 | MSLLEVIIVLGIIGTIAAGVVILAQRAFDSRAVTDLVTNTNTVVRVAMKDAYQRDGYPDFVDP LSLTANT |
| LngA-11381a   | 1 | MSLLEVIIVLGIIGTIAAGVVILAQRAFDSRAVTDLVTNTNTVVRVAMKDAYQRDGYPDFVDP LSLTANT |
| LngA-ECOR27   | 1 | MSLLEVIIVLGIIGTIAAGVVILAQRAFDSRAVTELVNTNTVVRVAMKDAYQRDGYPDFVDP LSLTANT  |

|               |    |                                                                                |
|---------------|----|--------------------------------------------------------------------------------|
| LngA-E9034A   | 71 | IKTDTS GIPAAQLVQLGKITPDEVRRNNSGDFI AIGGALTSNGA QVKKGF AIELNGLSQEQCRS ILGQVG    |
| LngA-M526-C6B | 71 | IKTDTS GIPAAQLVQLGKITPDEVRRNNSGDFI AIGGALTSNGA QVKKGF AIELNGLSQEQCRS ILGQVG    |
| LngA-01117-5  | 71 | IKTDTS GIPAAQLVQLGKITPDEVRRNNSGDFI AIGGALTSNGA QVKKGF AIELNGLSQEQCRS ILGQVG    |
| LngA-M626-C   | 71 | IKKDTG KIPAAQLVQLGKITPDEVRRNNSGDFI AIGGALTSNGA TVKKGF AIELNGLSQEQCRS ILGQVG    |
| LngA-10159a   | 71 | IKKDTG KIPAAQLVQLGKITPDEVRRNNSGDFI AIGGALTSNGA TVKKGF AIELNGLSQEQCRS ILGQVG    |
| LngA-B7A      | 71 | IKTNTG KIPAAQLVQLGKITPDEVRRNNSGDFI AIGGALTSNGA TVKKGF AIELNGLSQEQCRS ILGQVG    |
| LngA-Br5      | 71 | IKTDTG KIPAAQLVQLGKITPDEVRRNNSGDFI AIGGALTSNGA TVKKGF AIELNGLSQEQCRS ILGQVG    |
| LngA-M633-C1  | 71 | IKTDTG KIPAAQLVQLGKITPDEVRRNNSGDFI AIGGALTSNGA TVKKGF AIELNGLSQEQCRS ILGQVG    |
| LngA-11381a   | 71 | IKTDTG KIPAAQLVQLGKITPDEVRRNNSGDFI AIGGALTSNGA TVKKGF AIELNGLSQEQCRS ILGQVG    |
| LngA-ECOR27   | 71 | INTTDT KIPAAQLVQLGKIS PDEVRRNNSGDFI GIGGAKTSA AATV NKG FV IELNGLSQEQCR TILGQVG |

|               |     |                                                                         |
|---------------|-----|-------------------------------------------------------------------------|
| LngA-E9034A   | 141 | NNWEYVAIGT SASGS YAMTAT GVDMSVAASTT VLRSLGNNG QTLTADKILS TCTAQVNSITLGSR |
| LngA-M526-C6B | 141 | NNWEYVAIGT SASGS YAMTAT GVDMSVAASTT VLRSLGNNG QTLTADKILS TCTAQVNSITLGSR |
| LngA-01117-5  | 141 | NNWEYVAIGT SASGS YAMTAT GVDMSVAASTT VLRSLGNNG QTLTADKILS TCTAQVNSITLGSR |
| LngA-M626-C   | 141 | NNWEYVAVGNSASGS YAMQAAEVDMSVAATGD I LRTLGTDDG QTLTADKILS TCTAQVNSITLGSR |
| LngA-10159a   | 141 | NNWEYVAVGNSASGS YAMQAAEVDMSVAATGD I LRTLGTDDG QTLTADKILS TCTAQVNSITLGSR |
| LngA-B7A      | 141 | NNWEYVAVGNSASGS YAMQAAEVDMSVAATGD I LRTLGTDDG QTLTADKILS TCTAQVNSITLGSR |
| LngA-Br5      | 141 | NNWEYVAVGNSASGS YAMQAAEVDMSVAATGD I LRTLGTDDG QTLTADKILS TCTAQVNSITLGSR |
| LngA-M633-C1  | 141 | NNWEYVAVGNSASGS YAMQAAEVDMSVAATGD I LRTLGTDDG QTLTADKILS TCTAQVNSITLGSR |
| LngA-11381a   | 141 | NNWEYVAVGNSASGS YAMQAAEVDMSVAATGD I LRTLGTDDG QTLTADKILS TCTAQVNSITLGSR |
| LngA-ECOR27   | 141 | NNWEYVAVGNSASGAYSLTNT ALDMTTAANGTSLRSLGAN SQTLTAEKILATCTATVNSITLGSR     |

**Supplemental Figure S1. Amino acid sequence alignment of LngA variants.** Mature non-redundant LngA sequences from various ETEC strains: E9034A, GenBank Accession No. AAC33154; M526-C6B, ABV57880; 01117-5, ABV57862; M626-C, ABV57875; 10159a, ABV57868; B7A, ABV57871; Br5, ABV57878; M633-C1, ABV57876; 11381a, ABV57869; and ECOR27, ABV57879. Identical residues are shown in white text with red shading; homologous residues have black text and yellow shading.
